# Supplementary material
Source: PubMed Central journal article supplement (PMC1489972)
Supplement: pbio.0040225.st002.pdf [file pbio.0040225.st002.pdf]

**Table S2.** Qualitative and quantitative contribution to the tail epidermis of b-line blastomeres at the 110-cell stage.

| DiI-labelled blastomere | n. of DiI+cells at late tb stage | n. of CEN pairs | n. of epidermal cells |     |     |     |       | $\Sigma$ =n. of epidermal cells + n. of CEN pairs |
|-------------------------|----------------------------------|-----------------|-----------------------|-----|-----|-----|-------|---------------------------------------------------|
|                         |                                  |                 | dm                    | dml | l   | vml | vm    |                                                   |
| b8.22 (n=4 )            | 16                               | 0               |                       | 8   | 8   |     |       | 16                                                |
| b8.23 (n=15)            | 16                               | 0               |                       | 8   | 8   |     |       | 16                                                |
| b8.24 (n=25)            | 16                               | 0               |                       | 16* |     |     |       | 16                                                |
| b8.25 (n=17)            | 16                               | 0               |                       |     | 8   | 8   |       | 16                                                |
| b8.26 (n=3)             | 16                               | 0               |                       |     | 16  |     |       | 16                                                |
| b8.29 (n=6)             | 16                               | 0               |                       |     | 16  |     |       | 16                                                |
| b8.30 (n=5)             | 16                               | 0               |                       |     | 16* |     |       | 16                                                |
| b8.18 (n=10)            | 15-21                            | 1-5             | 8-15                  |     |     |     |       | 14 (n=6)<br>16 (n=4)                              |
| b8.20 (n=11)            | 16-17                            | 0-1             | 15-16*                |     |     |     |       | 16                                                |
| b8.21 (n=22)            | 12-13                            | 0-1             | 3-4                   | 8   |     |     |       | 12                                                |
| b8.27 (n=30)            | 14-18                            | 0-4#            |                       |     |     |     | 10-14 | 14                                                |
| b8.28 (n=8)             | 16-19                            | 0-3             |                       |     |     | 8   | 5-8   | 16                                                |
| b8.31 (n=31)            | 16-19                            | 0-3             |                       |     |     | 8   | 5-8   | 16                                                |
| b8.32 (n=18)            | 16-18                            | 0-2             |                       |     |     | 8*  | 5-8*  | 16                                                |
| b9.62 (n=11)            | 8-10                             | 0-2             |                       |     |     |     | 6-8   | 8                                                 |
| b9.56 (n=5)             | 8-10                             | 0-2             |                       |     |     |     | 6-8   | 8                                                 |

\* A variable number of epidermal cells generated by the anteriormost b-line blastomeres, b8.24, b8.30, b8.20 and b8.32, contributes to the trunk epidermis

# In addition to a variable number of CEN pairs, b8.27 also gives rise to a single ciliated cell at the tail tip
